# Supplementary material for: Porous (CuO)xZnO hollow spheres as efficient Rochow reaction catalysts
Source: Royal Society of Chemistry journal article supplement (doi:10.1039/c6ce00173d), 2016-01-01
Supplement: c6ce00173d1.pdf [file c6ce00173d1.pdf]

## Supplementary Information

### Porous (CuO)<sub>x</sub>ZnO hollow spheres as efficient Rochow reaction catalyst

Zailei Zhang,<sup>\*,a</sup> Yongjun Ji,<sup>a</sup> Jing Li,<sup>a</sup> Yongxia Zhu,<sup>a</sup> Ziyi Zhong<sup>b</sup> and Fabing Su<sup>\*,a</sup>

<sup>a</sup>State Key Laboratory of Multiphase Complex Systems, Institute of Process Engineering, Chinese Academy of Sciences, Beijing, China 100190,

<sup>b</sup> School of Chemical & Biomedical Engineering, Nanyang Technological University (NTU), 62 Nanyang Drive, Singapore 637459.

\*To whom correspondence should be addressed. E-mail address: zhangzl@ipe.ac.cn, fbsu@ipe.ac.cn, Tel.: +86-10-82544850, Fax: +86-10-82544851.

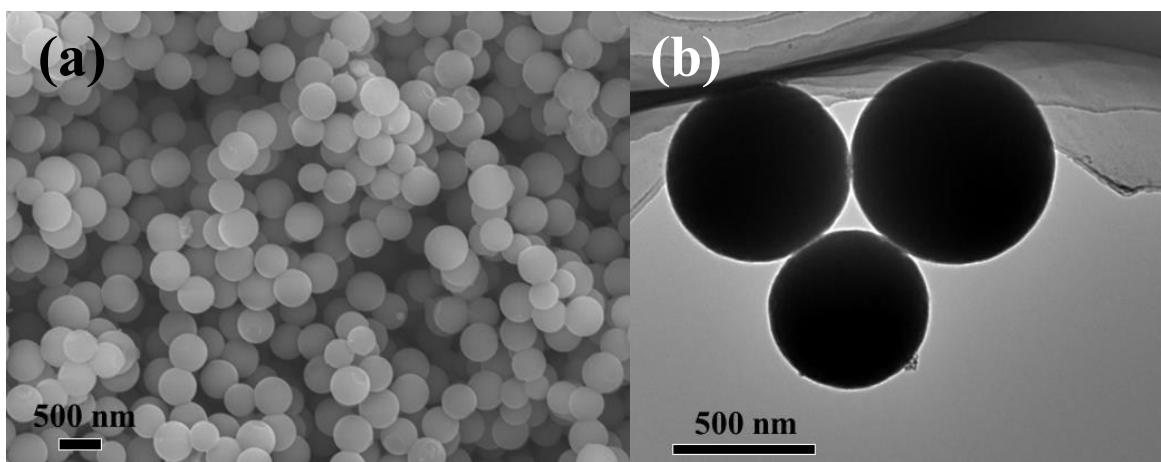

**Fig. S1** SEM (a) and TEM (b) images of carbonaceous spheres.

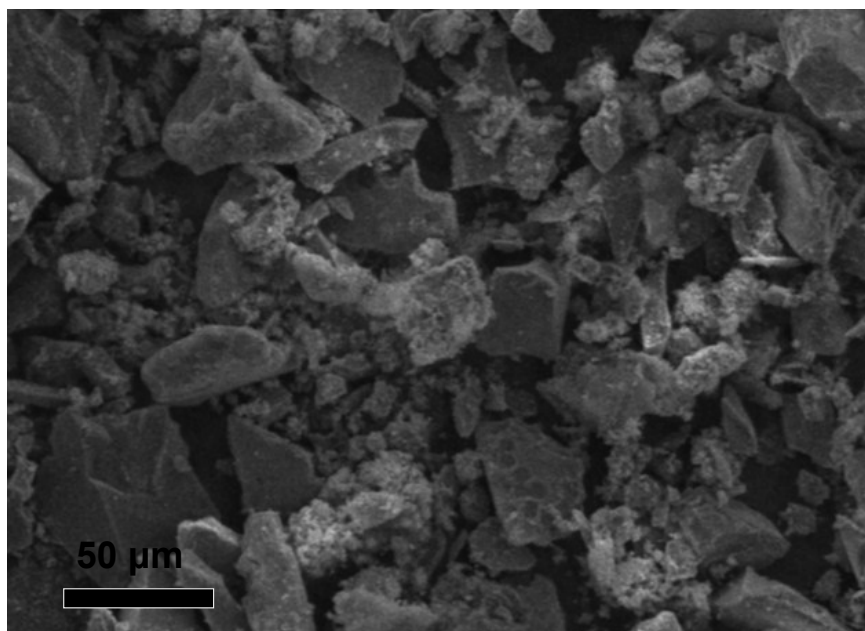

**Fig. S2** SEM image of contact masses with  $(\text{CuO})_{19}\text{ZnO}$  porous hollow spheres after reaction.
